# Supplementary material
Source: HighWire-hosted journal article supplement (https://www.qdcxjkg.com/highwire/filestream/121524/field_highwire_adjunct_files/10/ERJ-00541-2015_Table_S3.pdf)
Supplement: ERJ-00541-2015_Table_S3.pdf [file ERJ-00541-2015_Table_S3.pdf]

**TABLE S3**

| Cortical areas | COPD             |                             |                        |
|----------------|------------------|-----------------------------|------------------------|
|                | Control (n = 11) | Without hypoxaemia (n = 16) | With hypoxaemia (n=11) |
|                | $\rho$           | $\rho$                      | $\rho$                 |
| Dorsolateral   | -0.42            | 0.11                        | -0.07                  |
| Orbitofrontal  | -0.25            | 0.15                        | 0.18                   |
| Left PMA       | 0.41             | 0.19                        | -0.22                  |
| Left M1        | 0.35             | 0.58*                       | -0.25                  |
| Left S1        | 0.17             | 0.28                        | -0.15                  |
| Right PMA      | 0.10             | 0.16                        | 0.18                   |
| Right M1       | 0.28             | 0.04                        | 0.29                   |
| Right S1       | 0.31             | 0.36                        | -0.24                  |
